# Supplementary material for: A recent origin of Orf3a from M protein across the coronavirus lineage arising by sharp divergence
Source: PubMed Central journal article supplement — Comput Struct Biotechnol J. 2020 Dec 4;18:4093–102. doi: 10.1016/j.csbj.2020.11.047 (PMC7749296; doi:10.1016/j.csbj.2020.11.047), 2020-12-04
Supplement: mmc2.pdf [file mmc2.pdf]

Figure S1

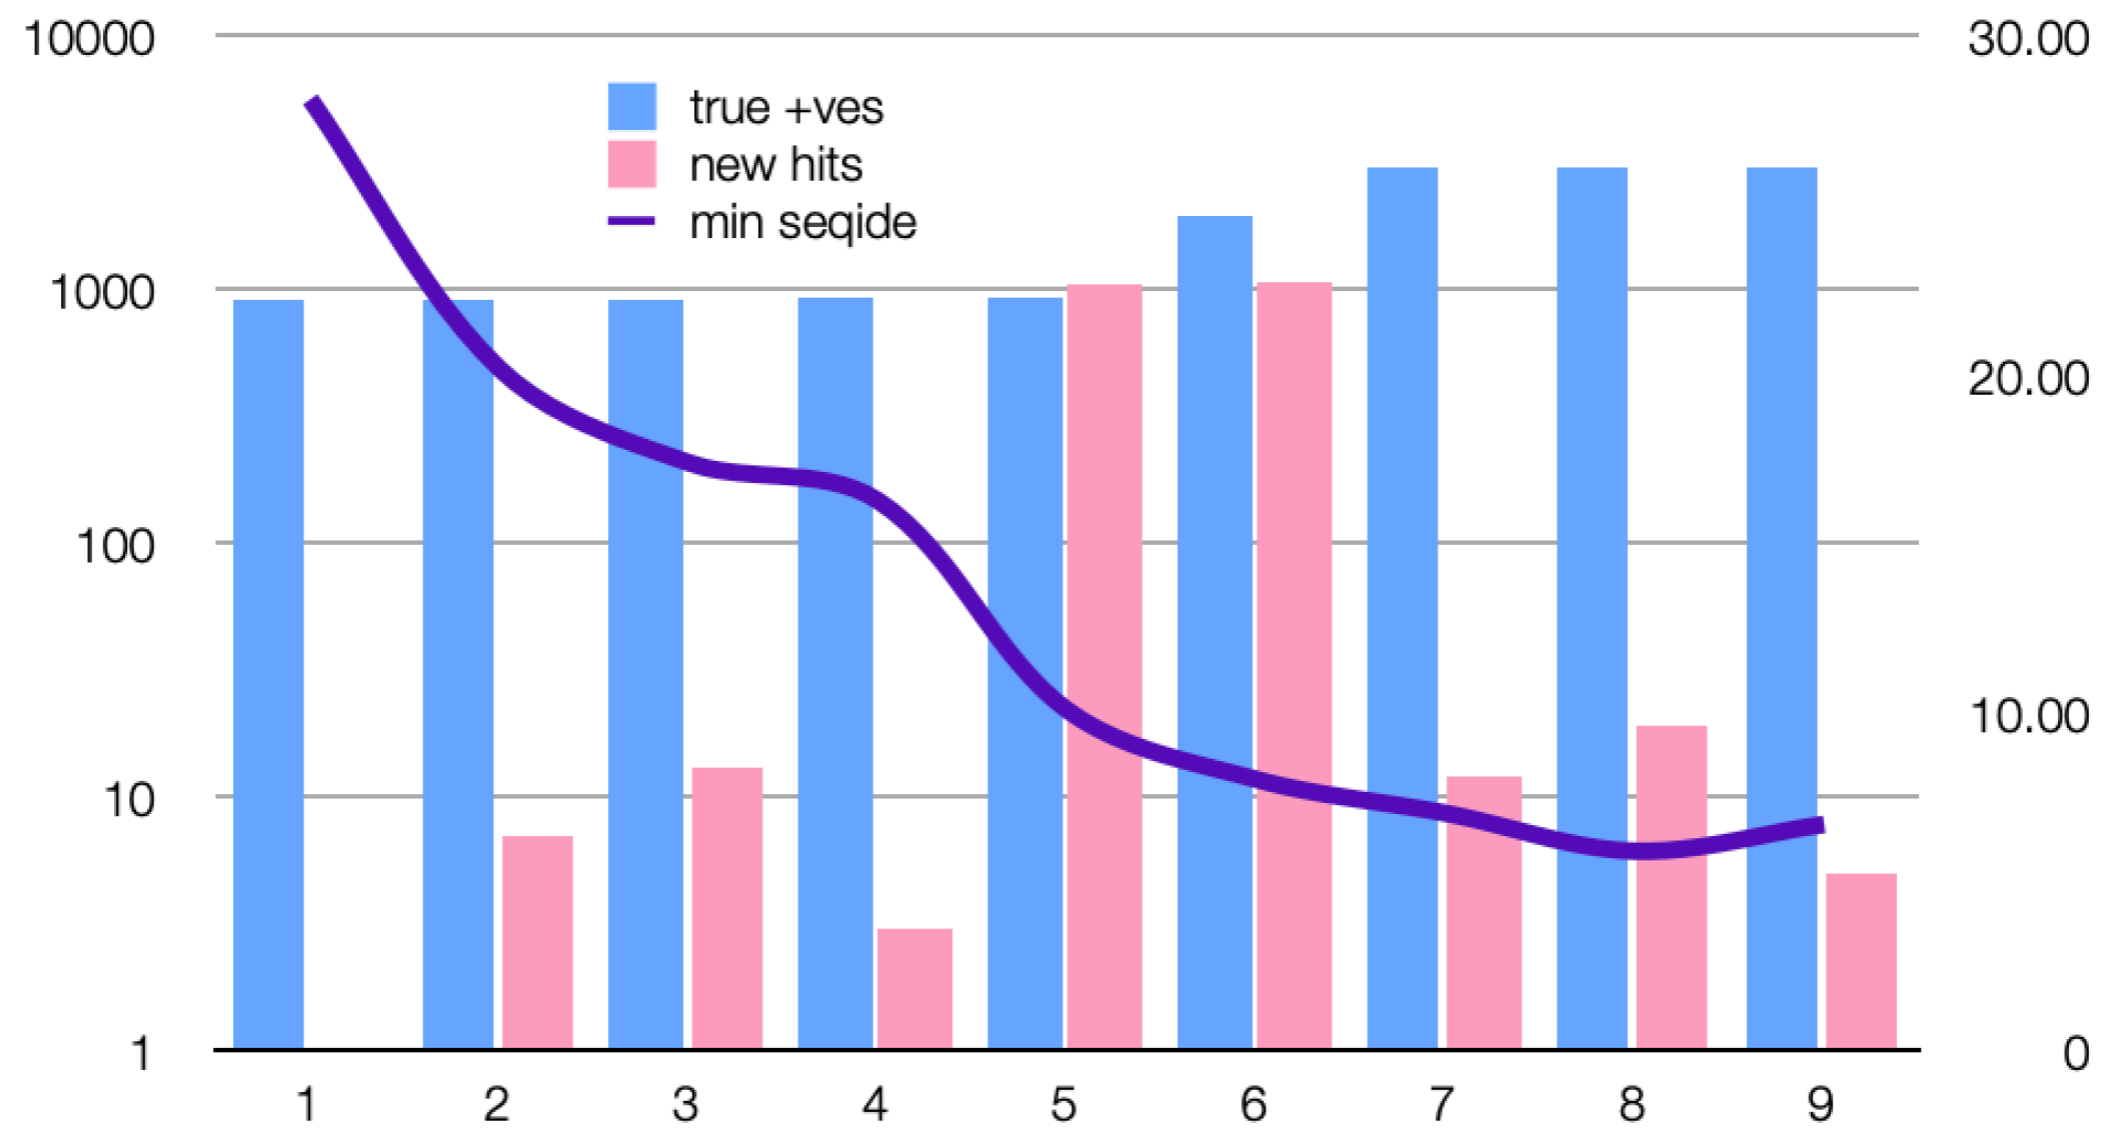



# Figure S3

(a)

```
SLPFGLIIVGVALLAVFQASAKIITLKKRWQLALSKGVHFC-----VAA 45
SLPFGLIIVGVALLAVFQASAKIITLKKRWQLALSKGVHFCNLLLEFVTVYSHLLVA 99
GLEAPFLYLYALVYFLOSINEV---R---KCRSKNPLLYDANYFLCWETNICYDYCIE 96
GLEAPFLYLYALVYFLOSINEVRIIMRLNCKRKRKPLLYDANYFLCWETNICYDYCIE 159
YNSV-----ITSGDGTTSPISEHDIYQGGYTERWESGVKDCVVLRSYFTSDYYQLYSTOL 151
YNSVTS-----ITSGDGTTSPISEHDIYQGGYTERWESGVKDCVVLRSYFTSDYYQLYSTOL 219
STDGVEHVTFFIYNKIVD 170
STDGVEHVTFFIYNKIVD 238
```

(b)

```
AGDI CLTIFLLVYIISWFLRADSI PAVIL--RFALTITGTF-----IA 42
SLPFGLIIVGVALLAVFQASAKIITLKKRWQLALSKGVHFCNLLLEFVTVYSHLLVA 99
VAVTIVAY-----VG---C---RCVSWLPLMADDDCFVVCYQSGGYNYCFPE 81
GLEAPFLYLYALVYFLOSINEVRIIMRLNCKRKRKPLLYDANYFLCWETNICYDYCIE 159
YDP-----NGPYVTLTVHNNGVTCGSHTIYGSVSVADRIQVVTIRNKNSYIQLONTF 132
YNSVTS-----ITSGDGTTSPISEHDIYQGGYTERWESGVKDCVVLRSYFTSDYYQLYSTOL 219
--DTGICIIAFYIADIAV- 148
STDGVEHVTFFIYNKIVD 238
```

(c)

```
TADIMLCIFLVIYLCYFLRSDSFIADVFKYLAGLLTGGFLC-----ATI 45
SLPFGLIIVGVALLAVFQASAKIITLKKRWQLALSKGVHFCNLLLEFVTVYSHLLVA 99
GVV-----LFMFSLGI---C---RCKSLVPLCADDCCFVNYVAGGKPYCMP 86
GLEAPFLYLYALVYFLOSINEVRIIMRLNCKRKRKPLLYDANYFLCWETNICYDYCIE 159
FDP-----NEPYLTLVHQNGITCGSYKLYGDVSIADRIYLYTLTKSVPYSLONTF 137
YNSVTS-----ITSGDGTTSPISEHDIYQGGYTERWESGVKDCVVLRSYFTSDYYQLYSTOL 219
--DAELCTIAFYIADIAVI 154
STDGVEHVTFFIYNKIVD 238
```

(d)

```
AYANRRFLYIIKLIFLWLLWPVTLACFVLAAYRINWITGG-----IA 43
SLPFGLIIVGVALLAVFQASAKIITLKKRWQLALSKGVHFCNLLLEFVTVYSHLLVA 98
IAMACLVRMLWLSYFIASFRLF---A---RTRSMWSEFNPELNILNVPVHGTILTRP 94
GLEAPFLYLYALVYFLOSINEVRIIMRLNCKRKRKPLLYDANYFLCWETNICYDYCIE 158
LLEG-----AVILRGHLRIAGHHLGRCDIK-----DLPKEITVATSRTLSYYKLGASO 142
YNSVTS-----ITSGDGTTSPISEHDIYQGGYTERWESGVKDCVVLRSYFTSDYYQLYSTOL 218
--RVAGDSGFAAYSRYRIGN- 160
STDGVEHVTFFIYNKIVD 238
```

(e)

```
AYANRRFLYIIKLIFLWLLWPVTLACFVLAAYRINWITGG-----IA 43
SLPFGLIIVGVALLAVFQASAKIITLKKRWQLALSKGVHFCNLLLEFVTVYSHLLVA 99
IAMACLVRMLWLSYFIASFRLF---A---RTRSMWSEFNPELNILNVPVHGTILTRP 94
GLEAPFLYLYALVYFLOSINEVRIIMRLNCKRKRKPLLYDANYFLCWETNICYDYCIE 159
LLEG-----AVILRGHLRIAGHHLGRCDIK-----DLPKEITVATSRTLSYYKLGASO 141
YNSVTS-----ITSGDGTTSPISEHDIYQGGYTERWESGVKDCVVLRSYFTSDYYQLYSTOL 219
--RVAGDSGFAAYSRYRIGN 159
STDGVEHVTFFIYNKIVD 238
```

(f)

```
AYANRRFLYIIKLIFLWLLWPVTLACFVLAAYRINWITGG-----IA 43
SLPFGLIIVGVALLAVFQASAKIITLKKRWQLALSKGVHFCNLLLEFVTVYSHLLVA 99
IAMTCLVRMLWLSYFIASFRLF---A---RTRSMWSEFNPELNILNVPVHGTILTRP 94
GLEAPFLYLYALVYFLOSINEVRIIMRLNCKRKRKPLLYDANYFLCWETNICYDYCIE 159
LLEG-----AVILRGHLRIAGHHLGRCDIK-----DLPKEITVATSRTLSYYKLGASO 142
YNSVTS-----ITSGDGTTSPISEHDIYQGGYTERWESGVKDCVVLRSYFTSDYYQLYSTOL 219
--RVAGDSGFAAYSRYRIGN 160
STDGVEHVTFFIYNKIVD 238
```

(g)

```
AYSNRRFLYIIKLIFLWLLWPVTLACFVLAAYRINWITGG-----IA 43
SLPFGLIIVGVALLAVFQASAKIITLKKRWQLALSKGVHFCNLLLEFVTVYSHLLVA 99
IAMACIVRMLWLSYFVASFRLF---A---RTRSMWSEFNPELNILNVPVHGTILTRP 94
GLEAPFLYLYALVYFLOSINEVRIIMRLNCKRKRKPLLYDANYFLCWETNICYDYCIE 159
LLEG-----AVILRGHLRMAGHSLGRCDIK-----DLPKEITVATSRTLSYYKLGASO 142
YNSVTS-----ITSGDGTTSPISEHDIYQGGYTERWESGVKDCVVLRSYFTSDYYQLYSTOL 219
--RVADSGFAVYHRYRIGN 160
STDGVEHVTFFIYNKIVD 238
```

(h)

```
AYATRSLLYIILKLVLLWLLWPVTLACFVLAAYRINWITGG-----IA 43
SLPFGLIIVGVALLAVFQASAKIITLKKRWQLALSKGVHFCNLLLEFVTVYSHLLVA 99
ITFAIIVRMLWLSYFVASFRLF---R---RTGSAWSEFNPELNILNVPVHGTILTRP 94
GLEAPFLYLYALVYFLOSINEVRIIMRLNCKRKRKPLLYDANYFLCWETNICYDYCIE 159
LQEV-----ATVARGVAVFAGHKLGRADL-----ESLPNEITVATSRTLSYFKMSRKY 142
YNSVTS-----ITSGDGTTSPISEHDIYQGGYTERWESGVKDCVVLRSYFTSDYYQLYSTOL 219
--NIGVSGVATYLRKIVGN 160
STDGVEHVTFFIYNKIVD 238
```

(i)

```
AYATRNLLYIILKLVLLWLLWPVTLACFVLAAYRINWITGG-----IA 43
SLPFGLIIVGVALLAVFQASAKIITLKKRWQLALSKGVHFCNLLLEFVTVYSHLLVA 99
VFFASAIRMLWLSYFVASFRLF---R---RTGSAWSEFNPELNILNVPVHGTILTRP 94
GLEAPFLYLYALVYFLOSINEVRIIMRLNCKRKRKPLLYDANYFLCWETNICYDYCIE 159
VPEV-----ATVYRSHLIVAGHKLGRADLSSISTE-----VTVATARTLSYKLSWRKE 143
YNSVTS-----ITSGDGTTSPISEHDIYQGGYTERWESGVKDCVVLRSYFTSDYYQLYSTOL 219
AGACN--GVVYLRKIVGN 160
STDGVEHVTFFIYNKIVD 238
```

**Figure S4**

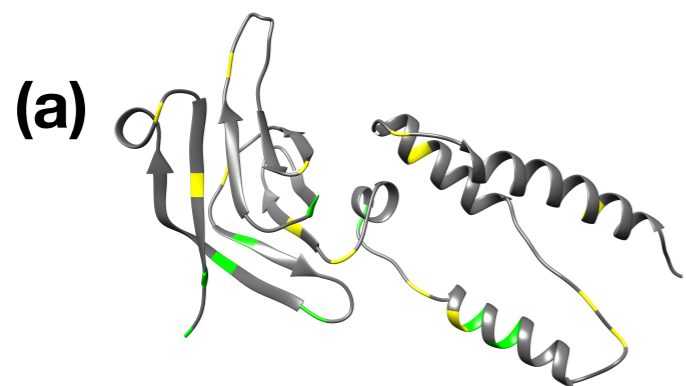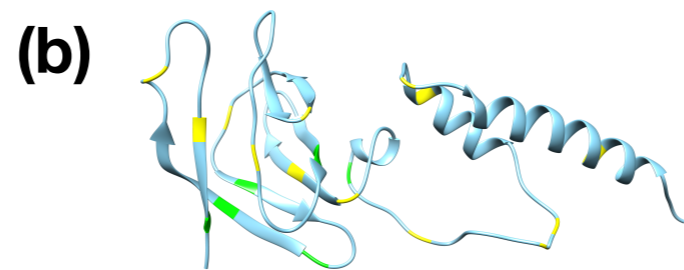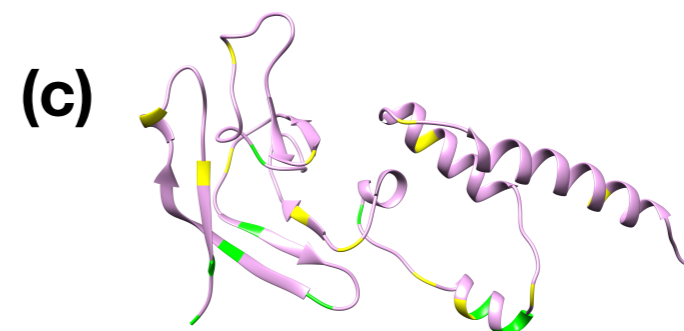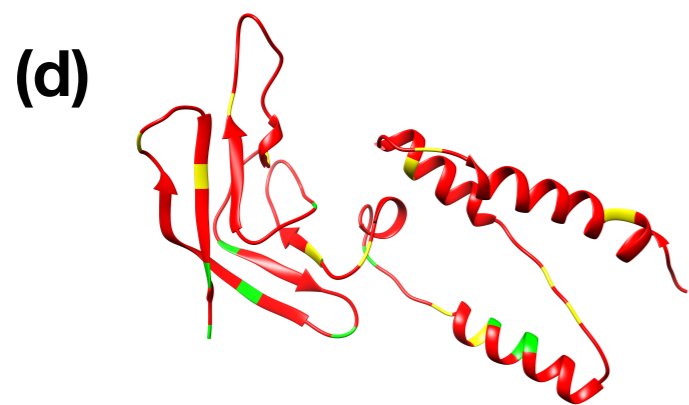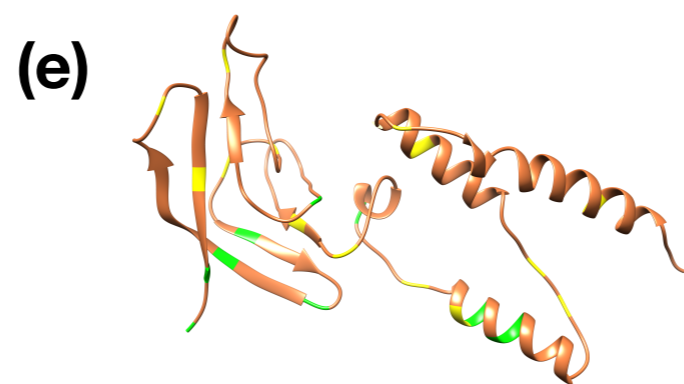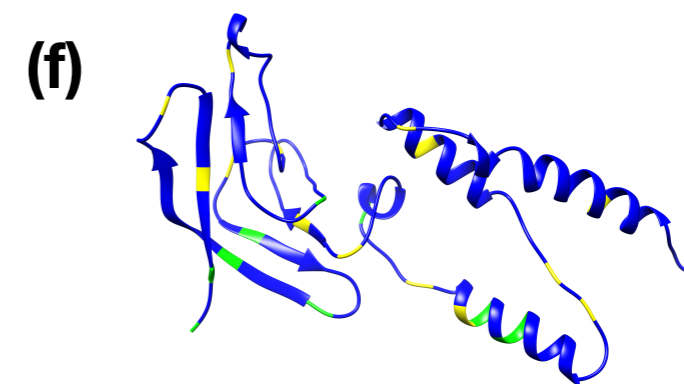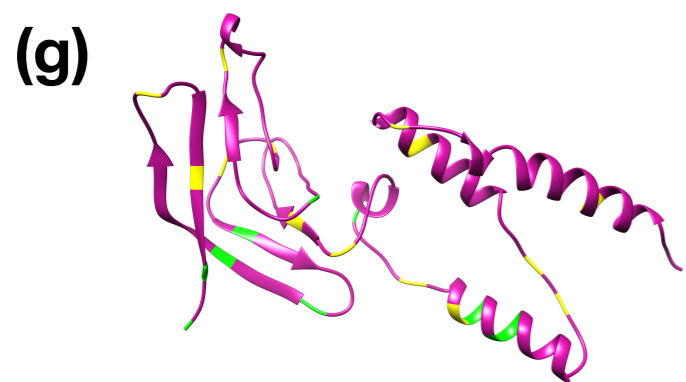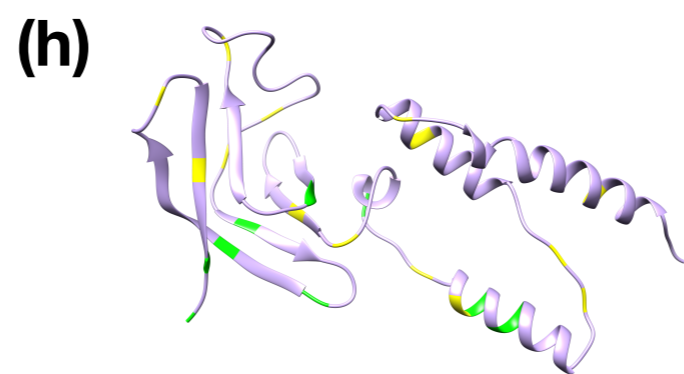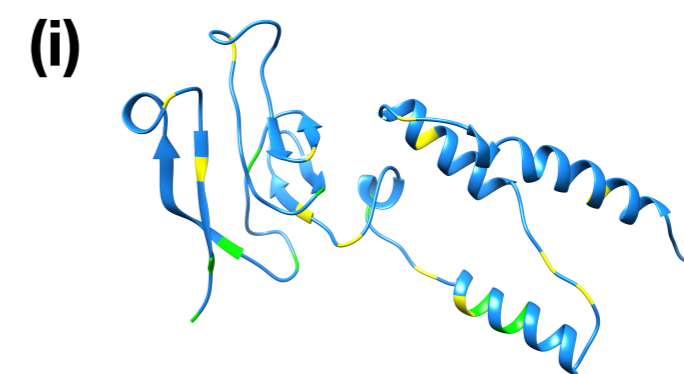

Figure S5

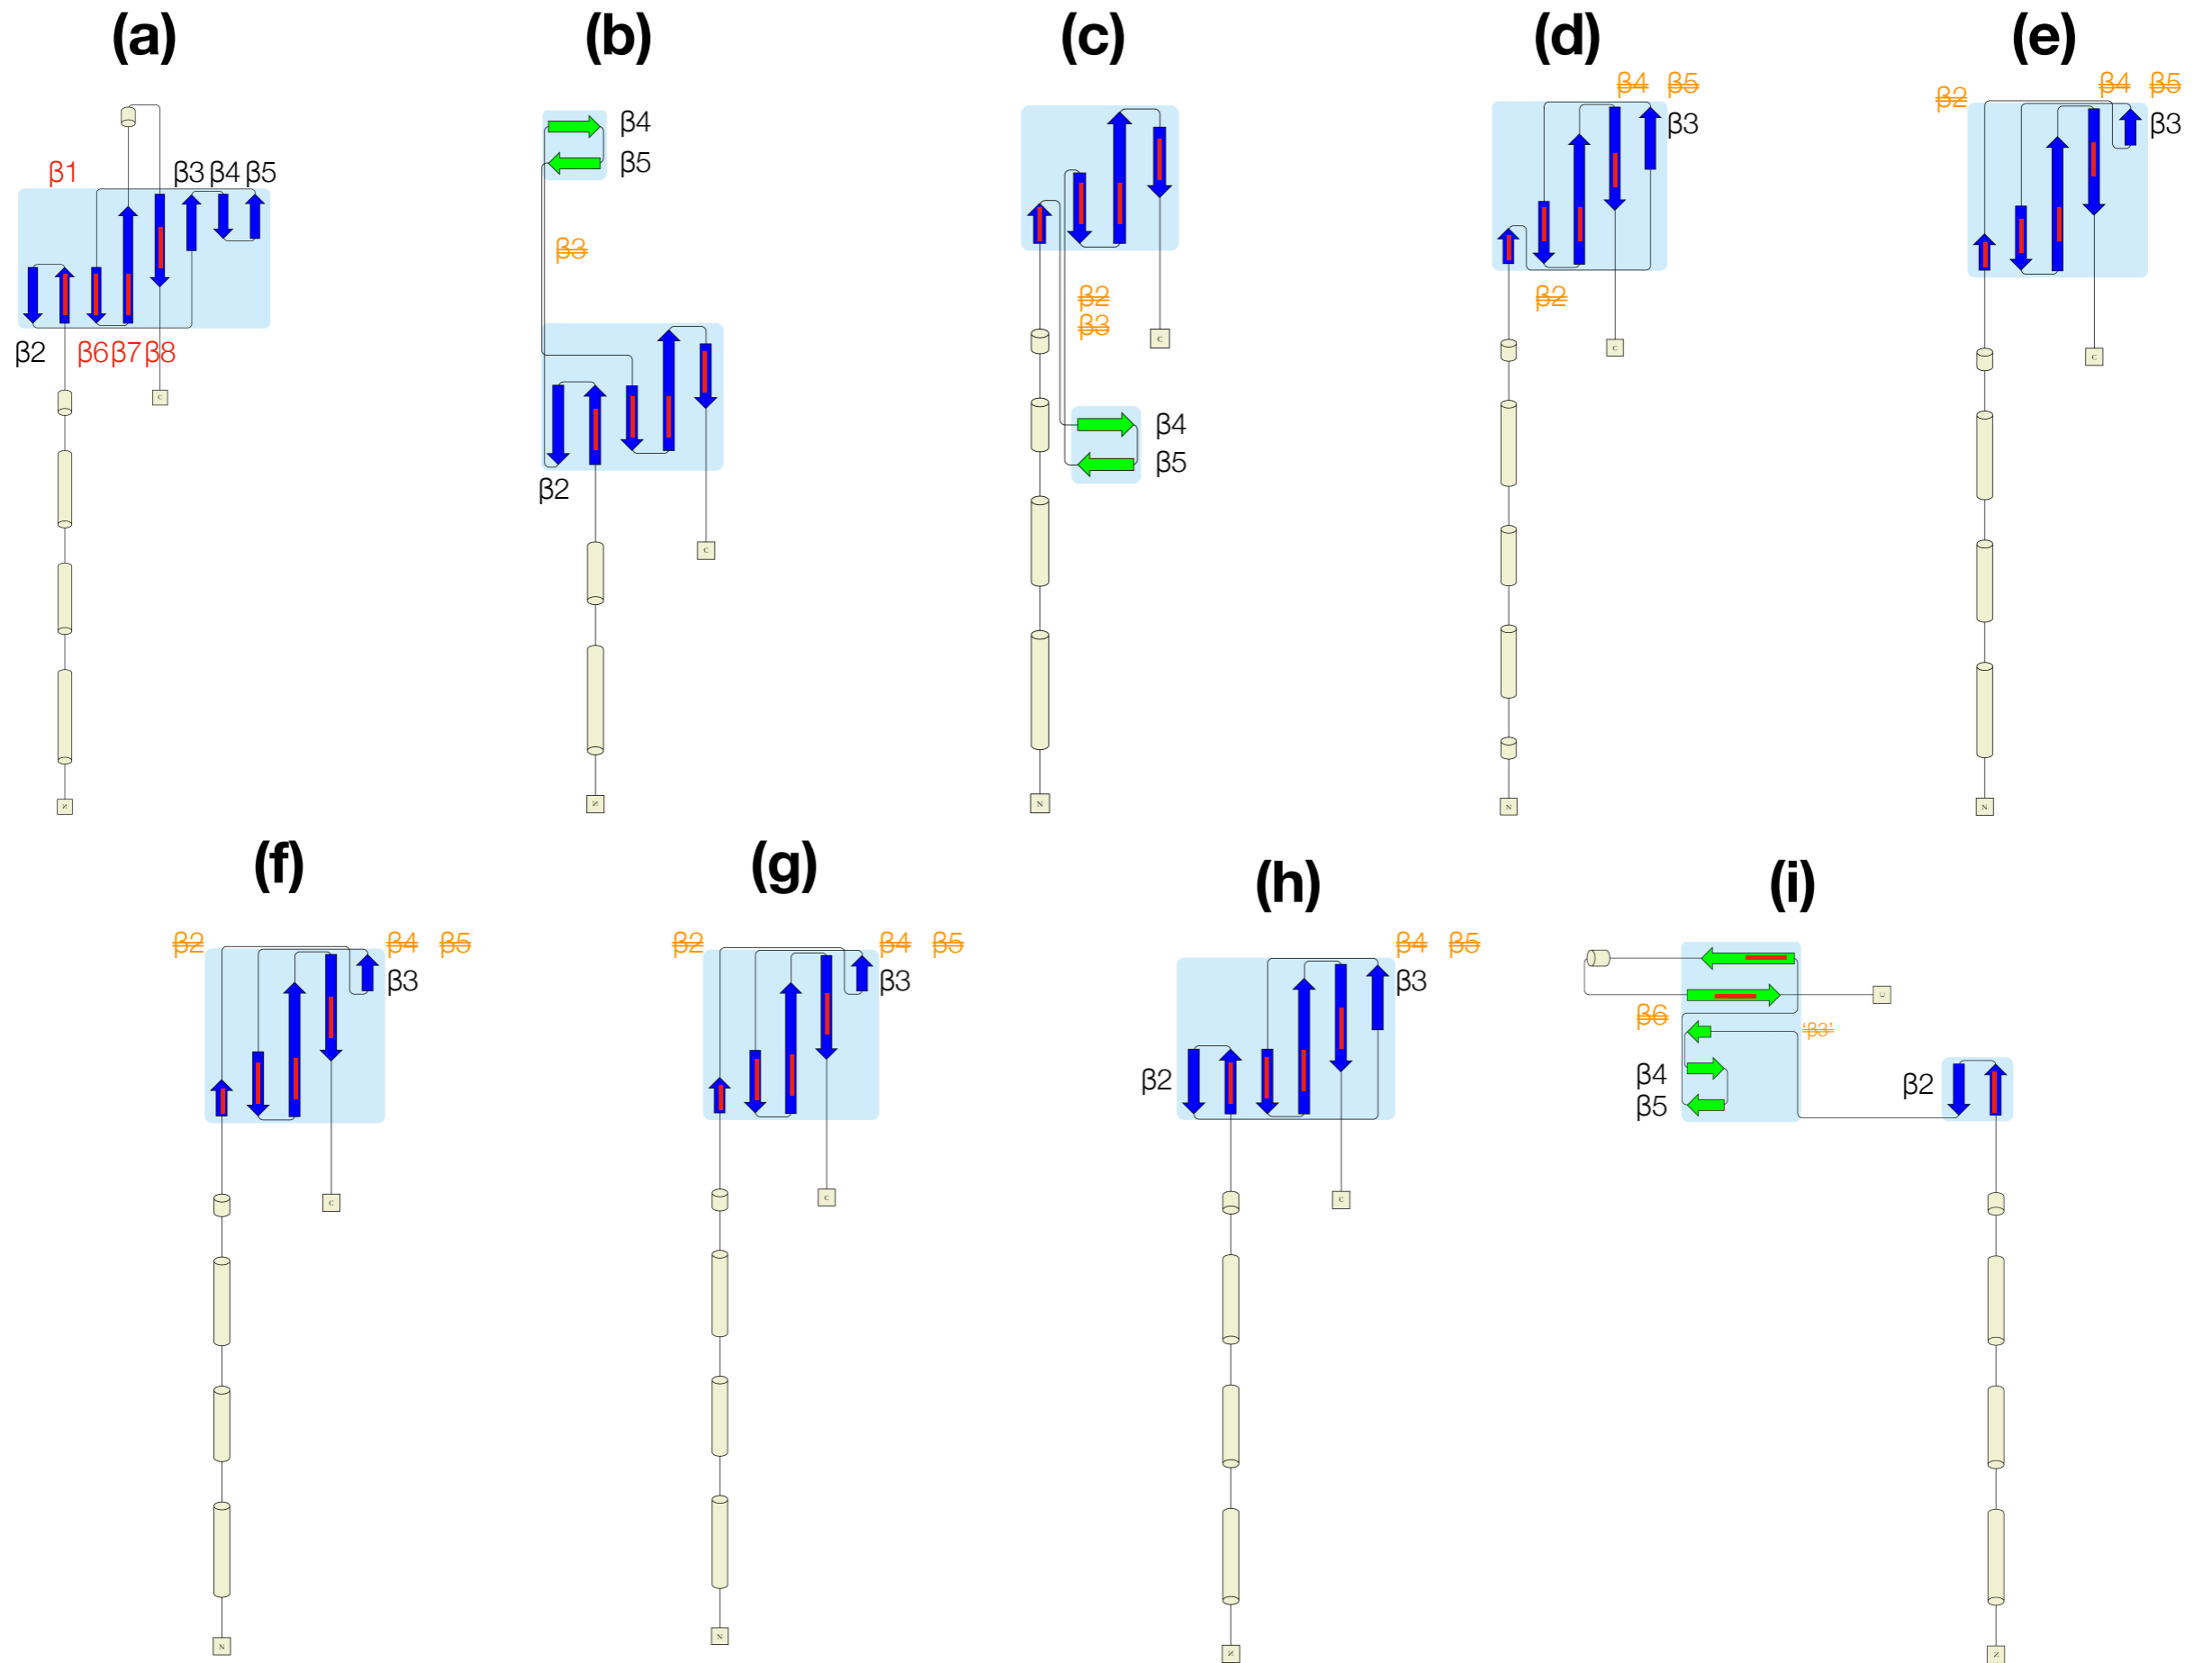

Figure S6

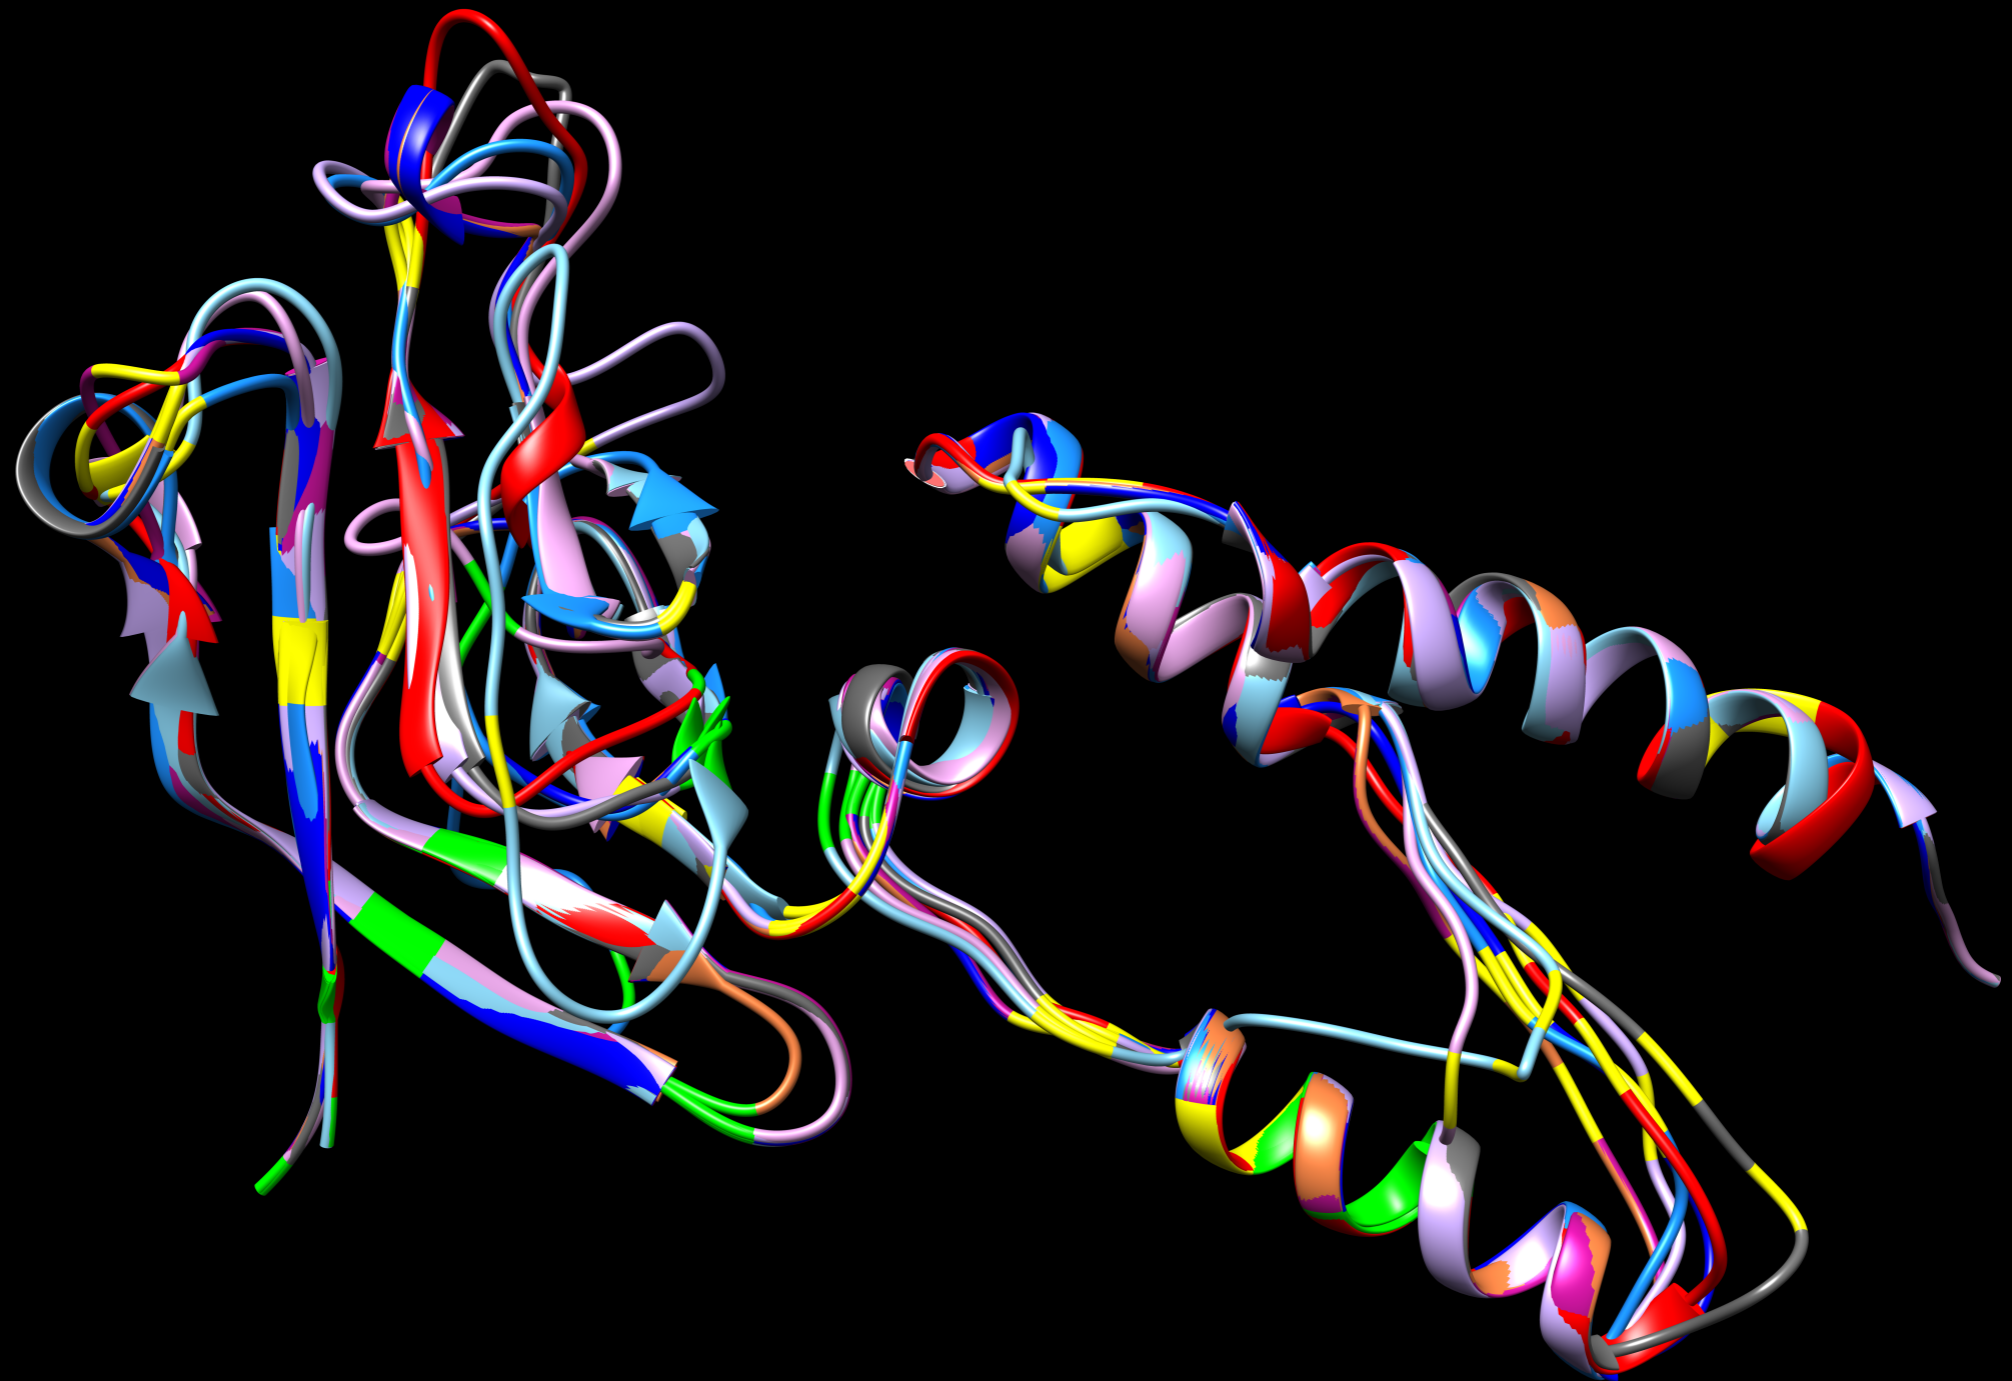

Figure S7

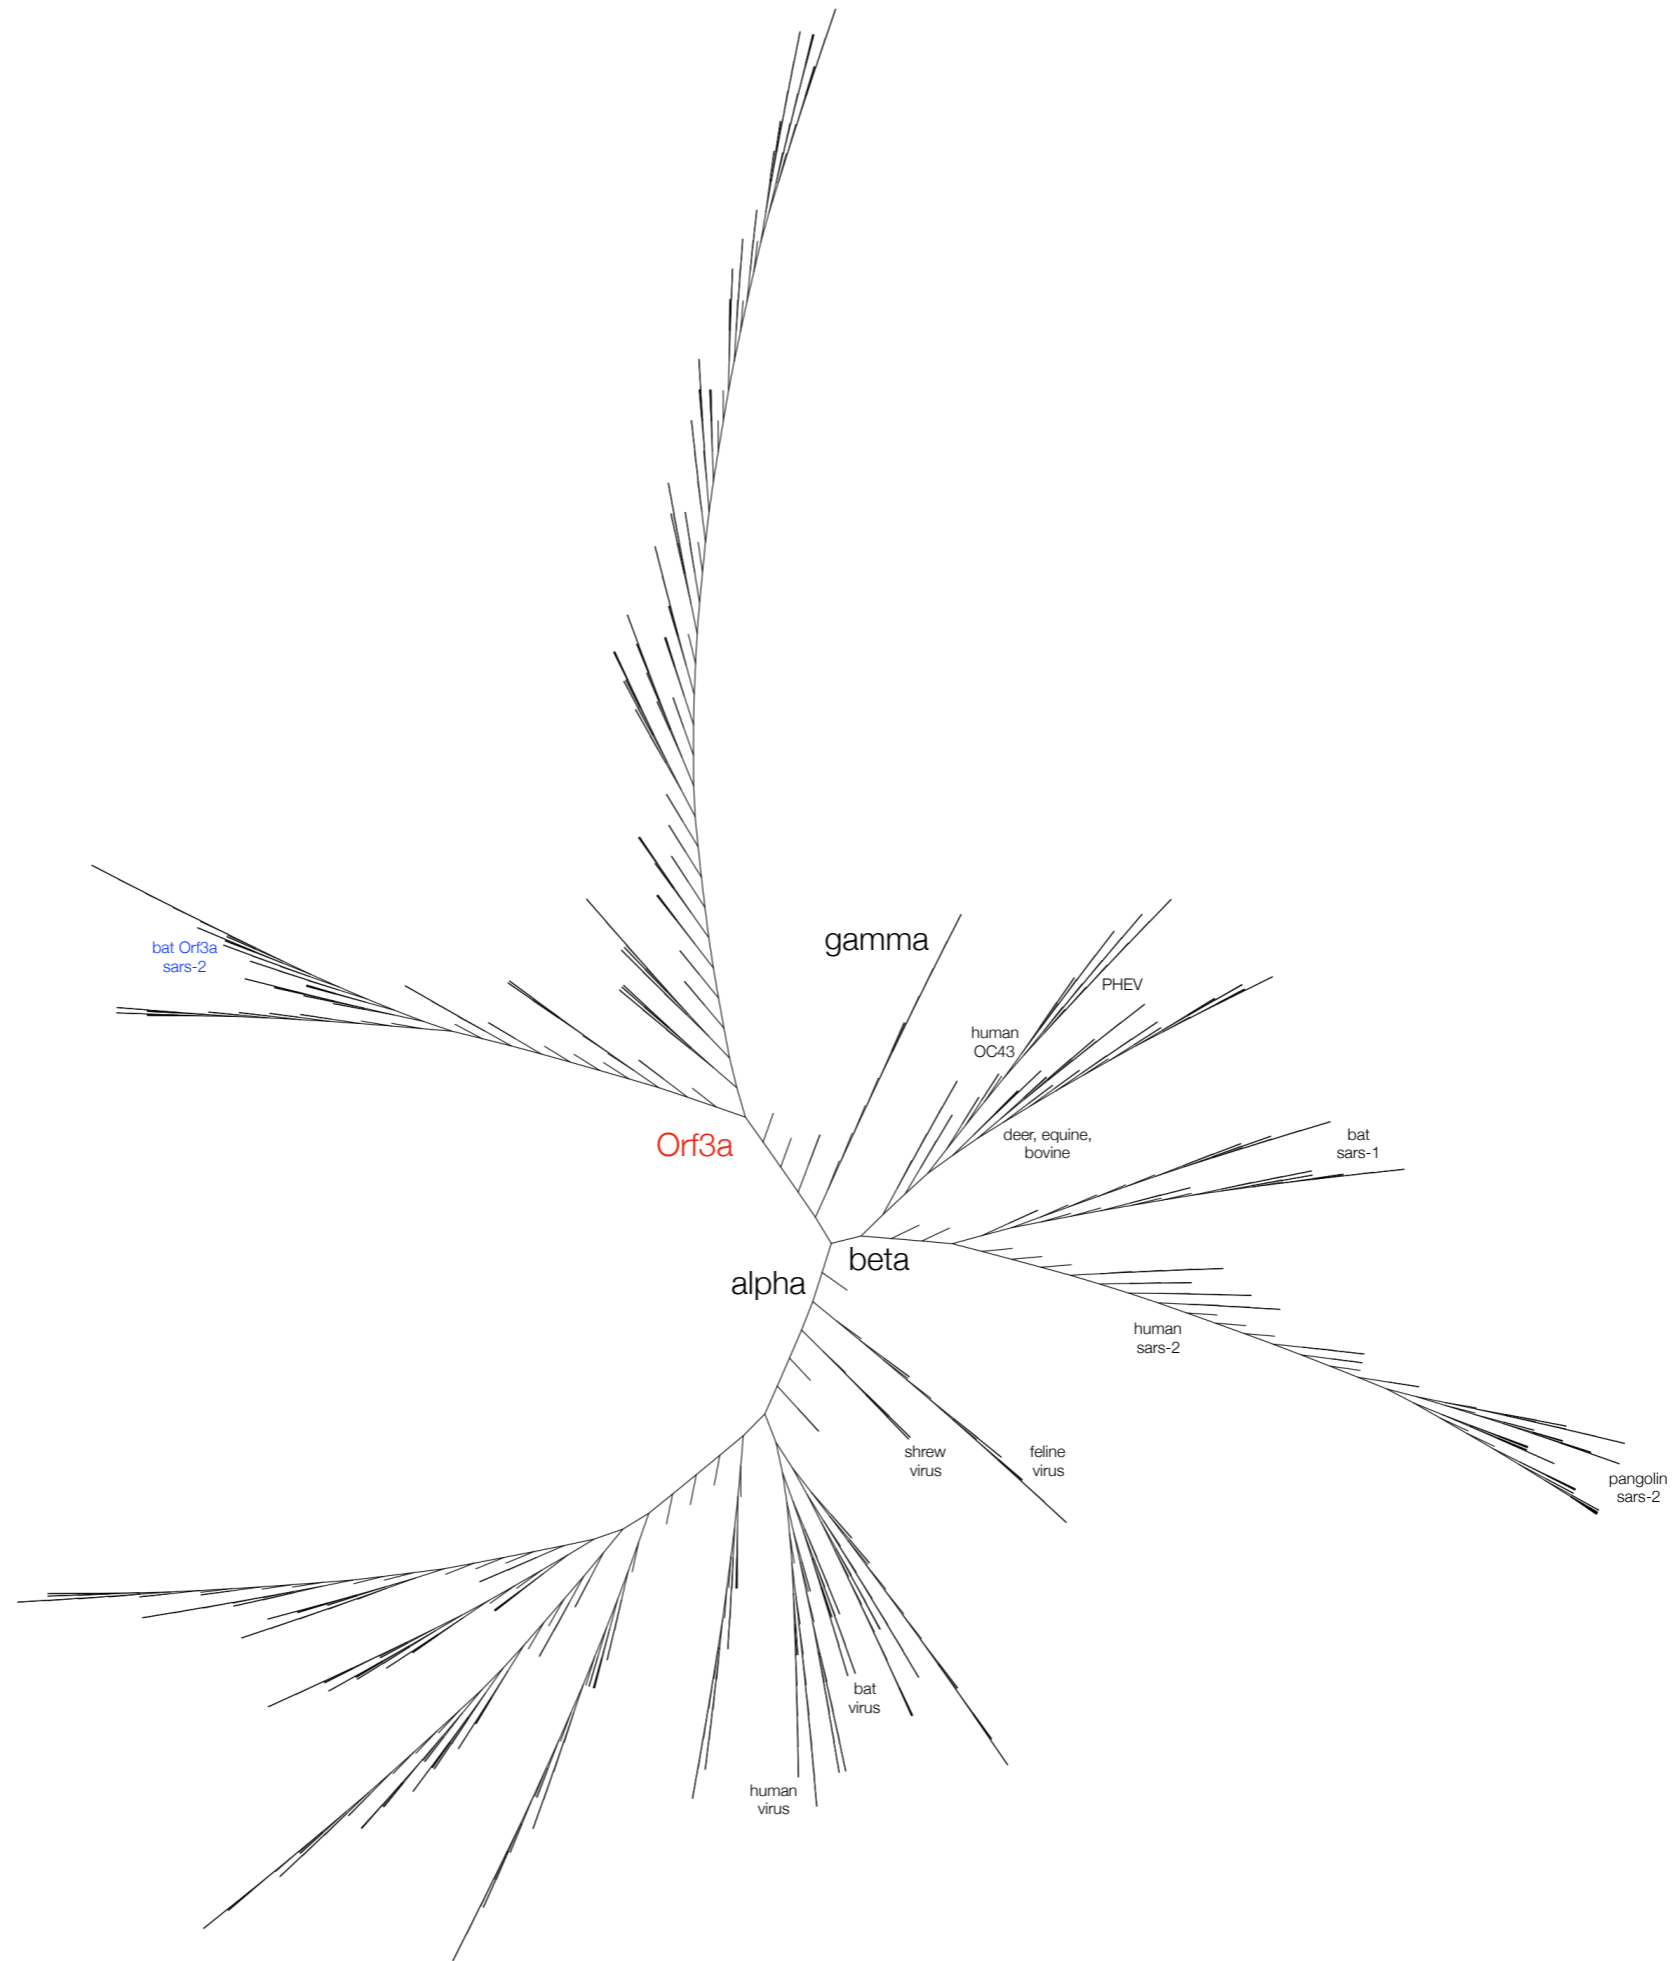

# Figure S8

Query: PF11289.8; AP3A\_CVHSA/1-273; Coronavirus accessory protein 3a  
Template: PF01635.18; VME1\_FIPV/40-260; Coronavirus M matrix/glycoprotein

```
143 ANYFVCWHTHNYDYCI PYN SVTD TIVVTEGDGISTPKLKEDYQIGGYSEDRHSGVKDYVVVHGYFTEVYYQLESTQITTD TGIENATF 230  
114 TNAILCVNALGRSYVLP LDGTPTGVTLTLLSGN---LYAEGFKMAGGLTIEH--LPKYVMIATPSRTIVYTLVGKQLKATTATGWAYY 196
```

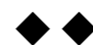

[http://ffas.godziklab.org/ffas-cgi/cgi/get\\_mu.pl?ses=&rv=PfamA32U\\*PfamA32U\\*re\\*PF11289&lv=](http://ffas.godziklab.org/ffas-cgi/cgi/get_mu.pl?ses=&rv=PfamA32U*PfamA32U*re*PF11289&lv=)

| # | Score    | Template                                                                         | Links and tools                              | %id |
|---|----------|----------------------------------------------------------------------------------|----------------------------------------------|-----|
| 1 | -160.000 | <a href="#">PF11289.8</a> ; AP3A_CVHSA/1-273; Coronavirus accessory protein 3a   | <a href="#">ali</a>                          | 100 |
| 2 | -11.600  | <a href="#">PF01635.18</a> ; VME1_FIPV/40-260; Coronavirus M matrix/glycoprotein | <a href="#">ali</a> <a href="#">follow..</a> | 17  |



# Table S1

| Run # | true +ves | new hits | all hits | excluded | final hits | PDB ids | min seqide | precision | comment                      | pfam    | save archive |
|-------|-----------|----------|----------|----------|------------|---------|------------|-----------|------------------------------|---------|--------------|
| 1     | 898       | 0        | 898      | 0        | 898        | 6xdc    | 28.10      | 100.00    | orf3a homologs               | PF11289 | KGB7F59A014  |
| 2     | 898       | 7        | 905      | 0        | 905        | na      | 20.14      | 100.00    | hypothetical bat orf3a's     | na      | KGBF0TZE014  |
| 3     | 905       | 13       | 918      | 0        | 918        | na      | 17.36      | 100.00    | orf3a homologs only          | na      | KGC2RBC0014  |
| 4     | 918       | 3        | 921      | 0        | 921        | na      | 16.24      | 100.00    | first 'feline' M proteins    | PF01635 | KGCB6UR6014  |
| 5     | 921       | 1034     | 1955     | 0        | 1955       | na      | 10.05      | 100.00    | almost 1000 M proteins       | na      | KGCTVD93014  |
| 6     | 1955      | 1069     | 3024     | 0        | 3024       | na      | 8.00       | 100.00    | another 1000 M proteins      | na      | KGD3TX9B016  |
| 7     | 3024      | 12       | 3036     | 25       | 3011       | na      | 7.00       | 100.00    | partial sequences (excluded) | na      | KGER1U38014  |
| 8     | 3011      | 19       | 3030     | 0        | 3025       | na      | 5.88       | 100.00    | more partial sequences       | na      | KGFXSXGP016  |
| 9     | 3025      | 5*       | 3025     | 0        | 3025       | na      | 6.67       | 100.00    | no hits, convergence         | na      | KGGMKT62014  |

**Table S2**

| sequence id             | description                    | model  | length | seq identity | QMEAN | C-beta | all-atom | solvation | torsion |
|-------------------------|--------------------------------|--------|--------|--------------|-------|--------|----------|-----------|---------|
| <b>a-6xdcA</b>          | SARS-CoV-2 Orf3a               | 3fnkwV | 170    | 100.00       | -4.53 | -3.99  | -1.14    | -3.06     | -2.64   |
| <b>b-ADY17912.1</b>     | Zaria bat CoV ZBCoV Orf3       | Krxq5Y | 148    | 20.95        | -5.61 | -3.51  | -3.02    | -6.10     | -2.79   |
| <b>c-YP_009072441.1</b> | Bat Hp Beta CoV Zhejiang2013   | 4cdPqa | 154    | 20.78        | -7.41 | -4.43  | -2.18    | -6.94     | -4.36   |
| <b>d-QIG55988.1</b>     | SARS-CoV-2 M                   | JBtQPZ | 160    | 5.66         | -6.13 | -3.95  | -1.98    | -5.01     | -3.67   |
| <b>e-QMJ19959.1</b>     | SARS-CoV-2 M                   | 3dyh3c | 159    | 12.58        | -7.00 | -3.92  | -2.50    | -4.98     | -4.53   |
| <b>f-QIQ54051.1</b>     | Pangolin CoV M                 | KrDHuh | 160    | 13.13        | -6.11 | -3.42  | -2.29    | -5.05     | -3.73   |
| <b>g-YP_003858587.1</b> | Bat CoV BM48-31/BGR2008 M      | 2kGQSz | 160    | 13.13        | -6.61 | -4.30  | -2.41    | -4.72     | -4.17   |
| <b>h-YP_009072443.1</b> | Bat Hp Beta CoV Zhejiang2013 M | TJjzr2 | 160    | 13.75        | -5.65 | -4.44  | -1.61    | -5.09     | -3.05   |
| <b>i-ADY69165.1</b>     | Zaria bat CoV ZBCoV M          | F2S4AZ | 160    | 16.25        | -7.31 | -3.95  | -2.55    | -5.42     | -4.72   |
| <b>average of a-i</b>   |                                |        | 159    | 24.03        | -6.26 | -3.99  | -2.19    | -5.15     | -3.74   |
| <b>native 6xdc</b>      | monomer of 6xdc                | na     | 238    | 100.00       | -3.22 | -3.46  | 0.72     | -1.30     | -2.05   |
| <b>native 6xdc</b>      | dimeric form (as in PDB)       | na     | 238    | 100.00       | -2.97 | -3.63  | 0.67     | -0.90     | -2.23   |
